# Supplementary material for: Tuning the electronic environment of zinc ions with a ligand for dendrite-free zinc deposition in an ionic liquid
Source: Royal Society of Chemistry journal article supplement (doi:10.1039/c7cp05345b), 2017-01-01
Supplement: c7cp05345b1.pdf [file c7cp05345b1.pdf]

Tuning the electronic environment of zinc ions with a ligand for dendrite-free zinc  
deposition in an ionic liquid

Zhen Liu,\* Guozhu Li, Tong Cui, Abhishek Lahiri, Andriy Borodin and Frank

Endres\*

Supporting Information

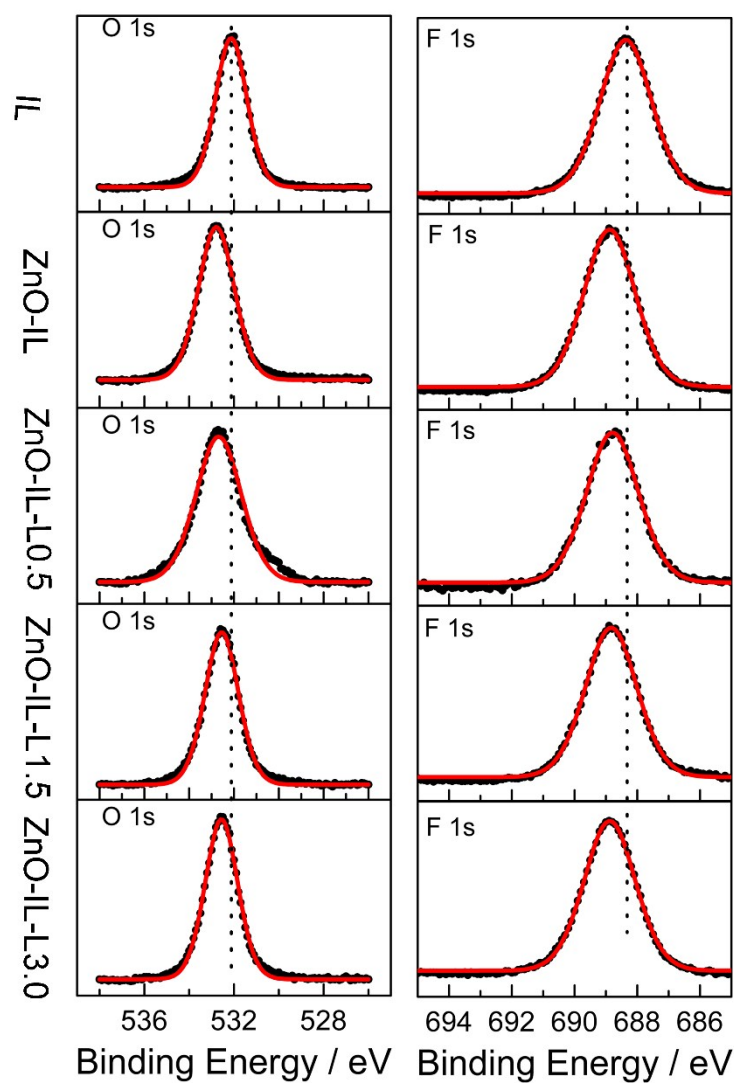

**Fig. S1** XPS spectra of neat [EIm]TfO and of 1.5 mol/L ZnO/[EIm]TfO containing

various concentrations of 2-methylimidazole (2-MIm) in the O1s and F1s regions.

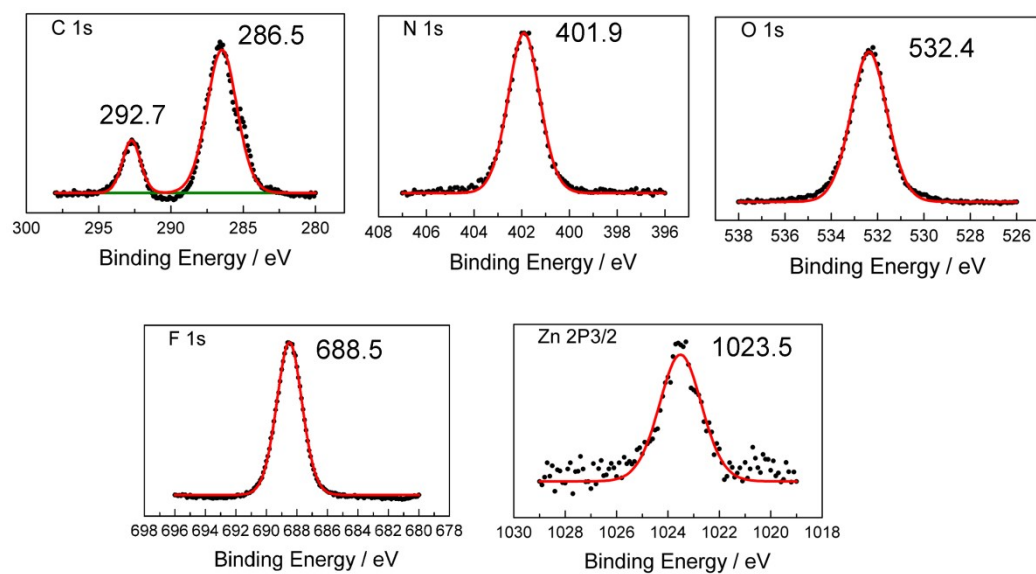

**Fig. S2** XPS spectra of 0.2 mol/L Zn(TfO)<sub>2</sub>/[EIm]TfO in the C1s, N1s, O1s, F1s and Zn2P<sub>3/2</sub> regions.

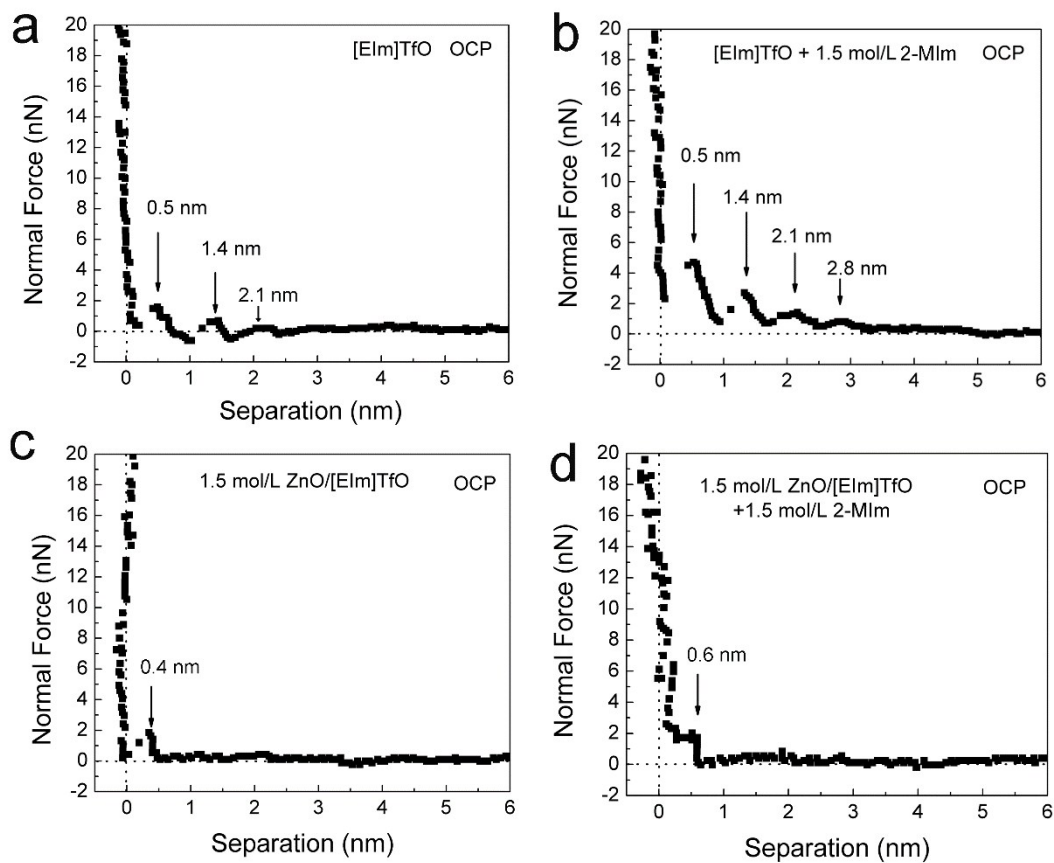

**Fig. S3** AFM force-distance profiles for a silica cantilever approaching an Au(111) surface at OCP in (a) [EIm]TfO, (b) 1.5 mol/L 2-MIm/[EIm]TfO, (c) 1.5 mol/L ZnO/[EIm]TfO and (d) 1.5 mol/L ZnO/[EIm]TfO+1.5 mol/L 2-MIm

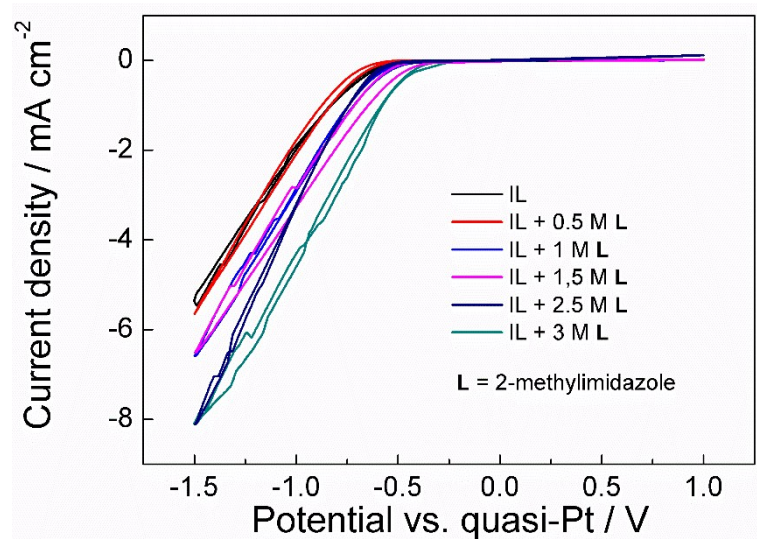

**Fig. S4** CVs of [EIm]TfO containing different concentrations of 2-MIm ligand.
